# Supplementary material for: FTO Gene Associates and Interacts with Obesity Risk, Physical Activity, Energy Intake, and Time Spent Sitting: Pilot Study in a Nigerian Population
Source: Hindawi journal article supplement (doi:10.1155/2017/3245270), 2017-01-01
Supplement: f1 [file 3245270.f1.pdf]

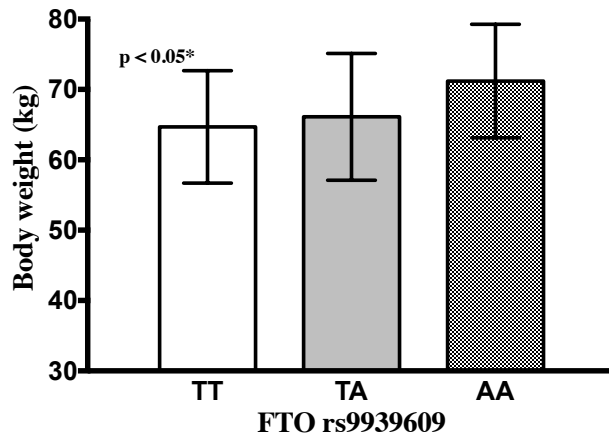

\* TA and AA not statistically different

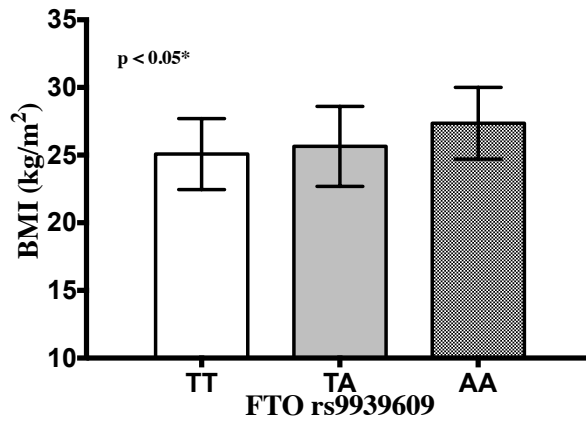

\* TA and AA not statistically different

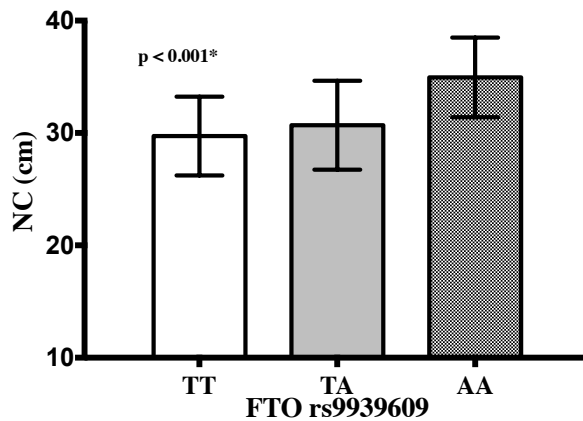

\* TA and AA not statistically different

Supplementary Figure 1. Association between FTO rs9939609 genotype and adiposity measures (body weight, BMI and NC). Least-squares means of genotypes were calculated by using Robust Linear Regression, with adjustment for age and sex.

BMI: Body mass index, NC: Neck circumference

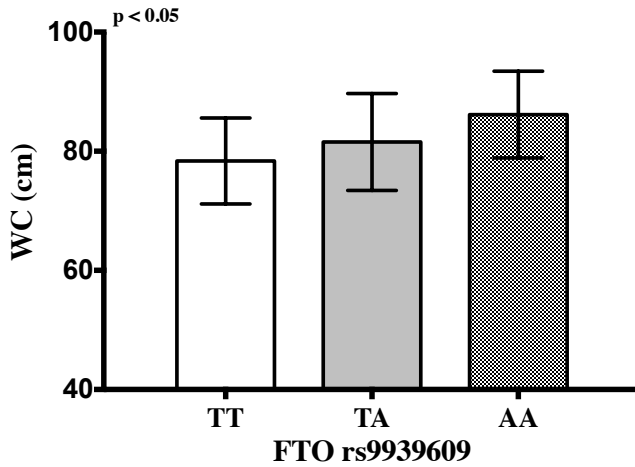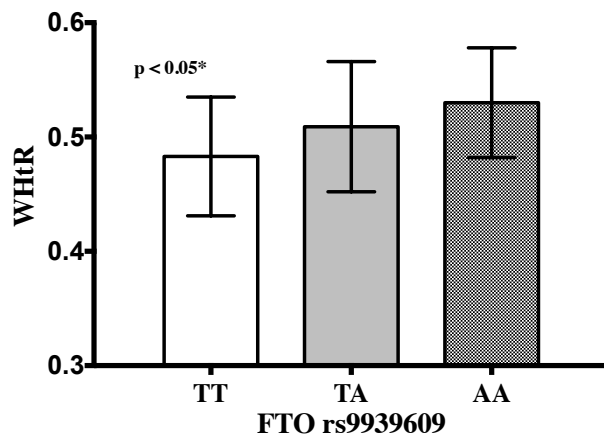

\* TA and AA not statistically different

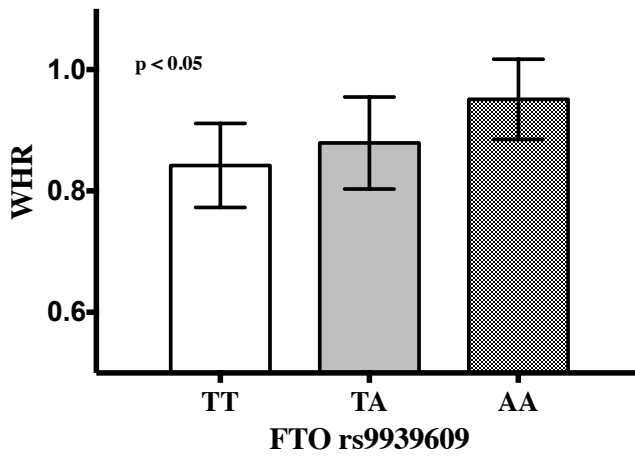

Supplementary Figure 2. Association between FTO rs9939609 genotype and adiposity measures (WC, WHtR and WHR). Least-squares means of genotypes were calculated by using Robust Linear Regression, with adjustment for age and sex.

WC: Waist circumference, WHtR: Waist to height ratio, WHR; Waist to hip ratio

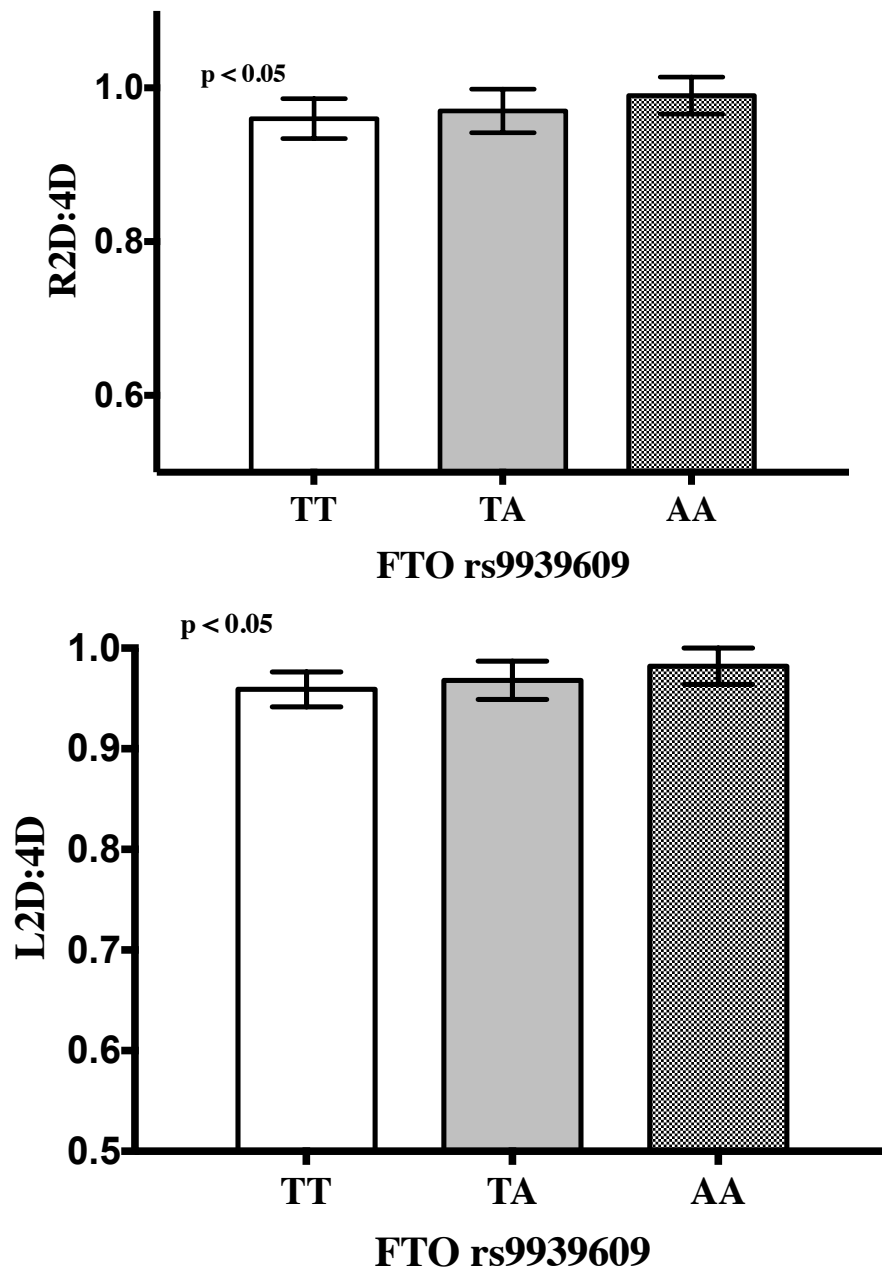

Supplementary Figure 3. Association between FTO rs9939609 genotype and adiposity measures (R2D:4D and L2D:4D). Least-squares means of genotypes were calculated by using Robust Linear Regression, with adjustment for age and sex.

R2D:4D and L2D:4D: Ratio of second to forth digit for right and left hand respectively

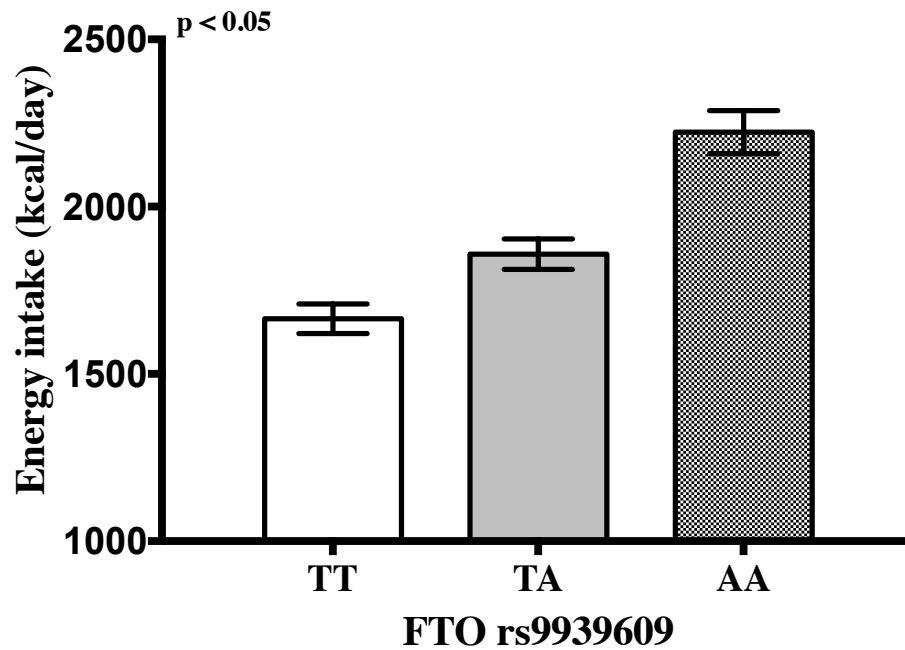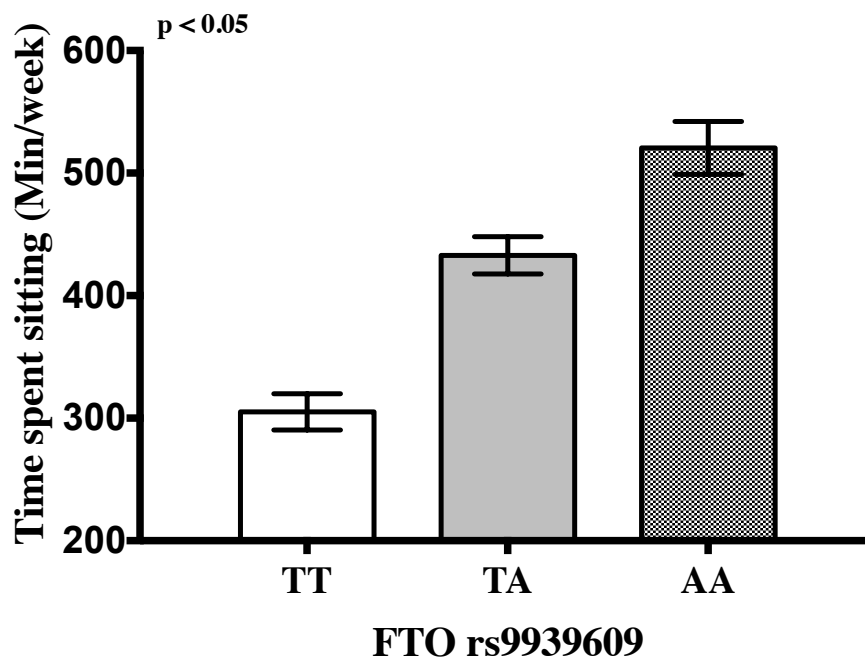

Supplementary Figure 4. Association between FTO rs9939609 genotype, Energy intake and TSS. Least-squares means of genotypes were calculated by using Robust Linear Regression, with adjustment for age and sex.

TSS: Time spent sitting

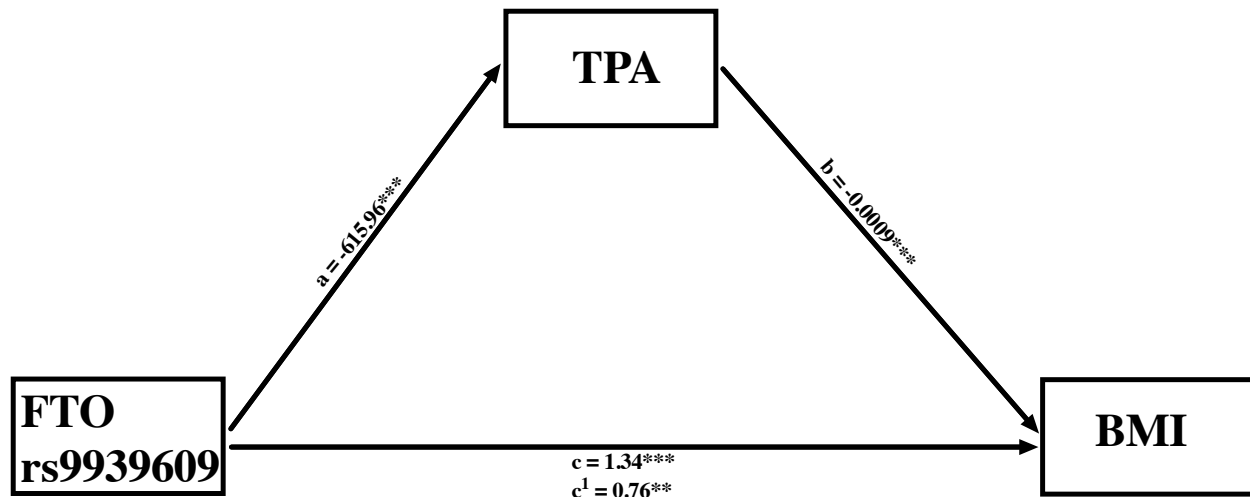

**Total indirect effect (Standardized) = 0.13, bias corrected 95% CI: 0.08-0.199;  $R^2 = 0.214$**

Supplementary Figure 5. Mediation effect of TPA on the association of FTO (rs9939609) with BMI using mediation model.

Standardized coefficients are presented and tested for significance with 95% confidence intervals calculated using the bias-corrected bootstrap method (5000 samples). a = standardized IV to Med coefficient, b = standardized Med to DV coefficient, c = standardized total effect (IV to DV),  $c^1$  = specific indirect effect (indirect path).

\*  $p < 0.05$  \*\*  $p < 0.01$  \*\*\*  $p < 0.001$

BMI: Body mass index, TPA: Total physical activity, IV: Independent variable, DV: Dependent variable and Med: Mediator

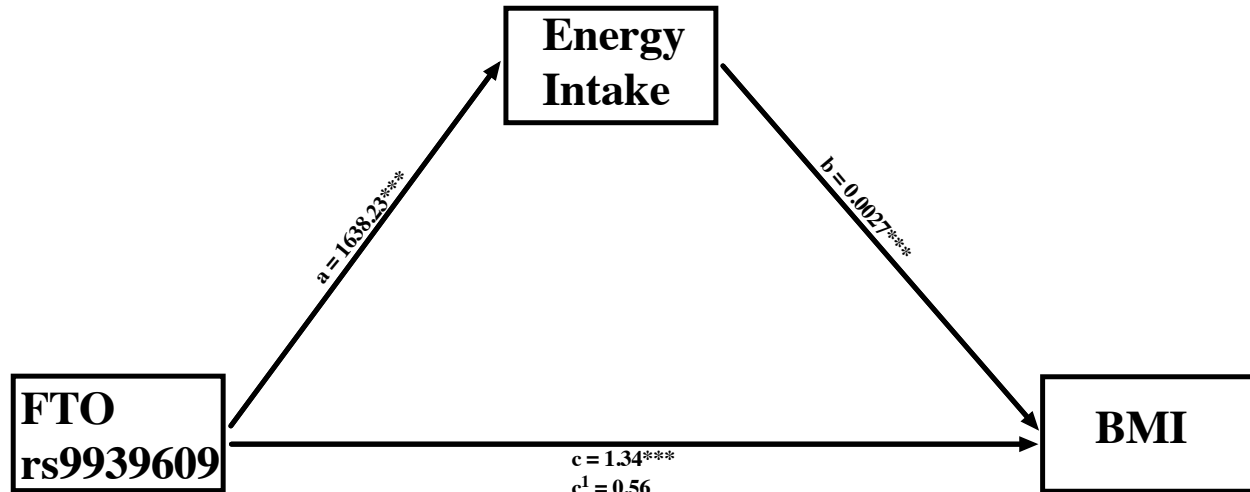

**Total indirect effect (Standardized) = 0.18, bias corrected 95% CI: 0.11-0.27;  $R^2 = 0.224$**

Supplementary Figure 6. Mediation effect of energy intake on the association of FTO (rs9939609) with BMI using mediation model.

Standardized coefficients are presented and tested for significance with 95% confidence intervals calculated using the bias-corrected bootstrap method (5000 samples). a = standardized IV to Med coefficient, b = standardized Med to DV coefficient, c = standardized total effect (IV to DV),  $c^1$  = specific indirect effect (indirect path).

\*  $p < 0.05$  \*\*  $p < 0.01$  \*\*\*  $p < 0.001$

BMI: Body mass index, IV: Independent variable, DV: Dependent variable and Med: Mediator

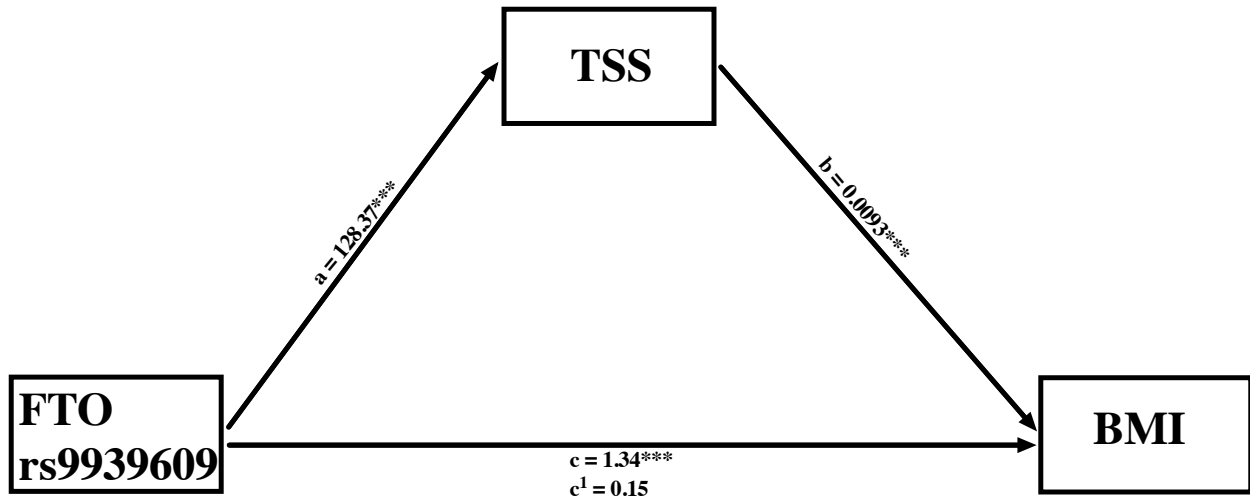

**Total indirect effect (Standardized) = 0.28, bias corrected 95% CI: 0.20-0.38;  $R^2 = 0.30$**

Supplementary Figure 7. Mediation effect of TSS on the association of FTO (rs9939609) with BMI using mediation model.

Standardized coefficients are presented and tested for significance with 95% confidence intervals calculated using the bias-corrected bootstrap method (5000 samples). a = standardized IV to Med coefficient, b = standardized Med to DV coefficient, c = standardized total effect (IV to DV),  $c^1$  = specific indirect effect (indirect path).

\*  $p < 0.05$  \*\*  $p < 0.01$  \*\*\*  $p < 0.001$

BMI: Body mass index, TSS: Time spent sitting, IV: Independent variable, DV: Dependent variable and Med: Mediator

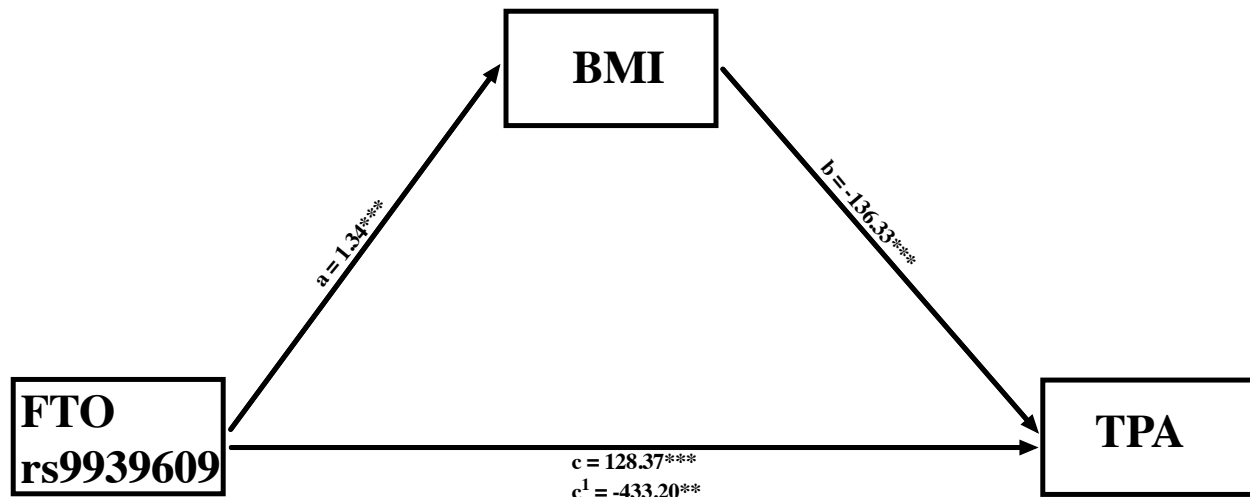

**Total indirect effect (Standardized) = 0.11, bias corrected 95% CI: -0.178 to -0.057;  $R^2 = 0.248$**

Supplementary Figure 8. Mediation effect of BMI on the association of FTO (rs9939609) with TPA using mediation model.

Standardized coefficients are presented and tested for significance with 95% confidence intervals calculated using the bias-corrected bootstrap method (5000 samples). a = standardized IV to Med coefficient, b = standardized Med to DV coefficient, c = standardized total effect (IV to DV),  $c^1$  = specific indirect effect (indirect path).

\*  $p < 0.05$  \*\*  $p < 0.01$  \*\*\*  $p < 0.001$

BMI: Body mass index, TPA: Total physical activity, IV: Independent variable, DV: Dependent variable and Med: Mediator.



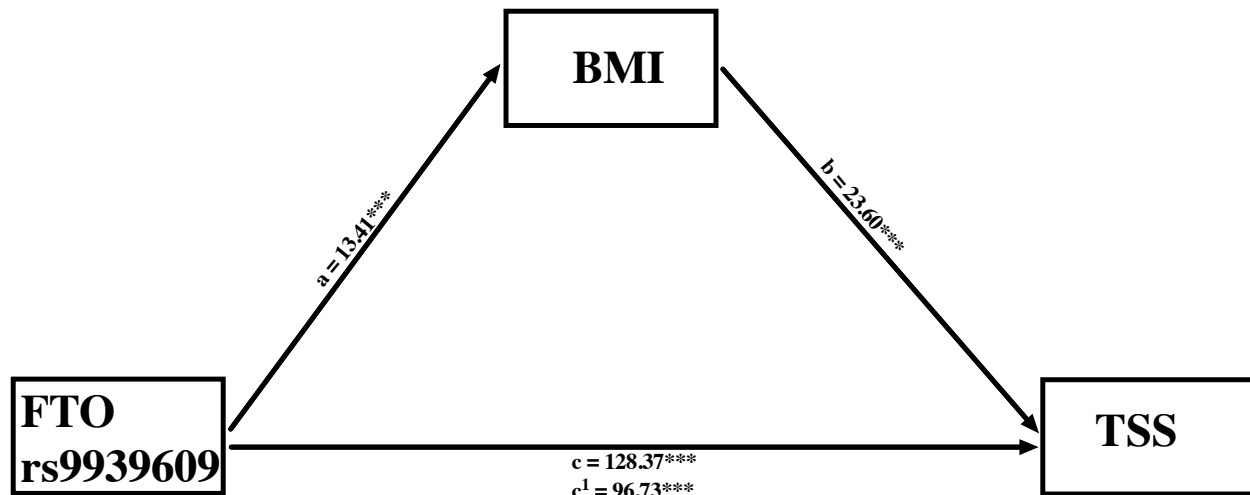

**Total indirect effect (Standardized) = 0.13, bias corrected 95% CI: 0.08-0.2;  $R^2 = 0.441$**

Supplementary Figure 9. Mediation effect of BMI on the association of FTO (rs9939609) with TSS using mediation model.

Standardized coefficients are presented and tested for significance with 95% confidence intervals calculated using the bias-corrected bootstrap method (5000 samples). a = standardized IV to Med coefficient, b = standardized Med to DV coefficient, c = standardized total effect (IV to DV),  $c^1$  = specific indirect effect (indirect path).

\*  $p < 0.05$  \*\*  $p < 0.01$  \*\*\*  $p < 0.001$

BMI: Body mass index, TSS: Time spent sitting, IV: Independent variable, DV: Dependent variable and Med: Mediator.

Supplementary Table 1: Anthropometric traits of overweight and control subjects stratified by FTO rs6639609 variants

|                          | Control (n = 98)         |                             |                             |        | Overweight/obesity (n = 103) |                              |                             |         |
|--------------------------|--------------------------|-----------------------------|-----------------------------|--------|------------------------------|------------------------------|-----------------------------|---------|
|                          | TT (n=55)                | TA(n=33)                    | AA(n=10)                    | p      | TT(n=20)                     | TA(n=57)                     | AA(n=26)                    | p       |
| Body weight (kg)         | 63.59(7.61) <sup>a</sup> | 58.36(8.32)                 | 67.34(5.83) <sup>a</sup>    | 0.011* | 69.00(8.05)                  | 71.48(8.43)                  | 73.54(8.77)                 | 0.49    |
| BMI (kg/m <sup>2</sup> ) | 23.65(0.97)              | 22.56(1.77)                 | 23.73(1.06)                 | 0.414  | 28.50(1.80)                  | 28.15(1.81)                  | 29.23(1.58)                 | 0.499   |
| NC(cm)                   | 29.40(2.73)              | 28.87(4.16)                 | 33.47(5.03)                 | 0.78   | 30.60(2.16) <sup>a</sup>     | 32.10(3.00) <sup>a</sup>     | 35.87(4.03)                 | <0.001* |
| WC(cm)                   | 75.80(5.33)              | 76.61(6.60)                 | 79.40(10.54)                | 0.73   | 84.81(7.44) <sup>a</sup>     | 86.23(5.38) <sup>a</sup>     | 89.00(5.26)                 | 0.019*  |
| WHtR                     | 0.460(0.03)              | 0.475(0.04)                 | 0.462(0.06)                 | 0.5    | 0.538(0.04)                  | 0.544(0.04)                  | 0.559(0.03)                 | 0.083   |
| WHR                      | 0.818(0.05) <sup>a</sup> | 0.828(0.05) <sup>a</sup>    | 0.884(0.07)                 | 0.02*  | 0.901(0.07) <sup>a</sup>     | 0.914(0.06) <sup>a</sup>     | 0.985(0.06)                 | <0.001* |
| R2D:4D                   | 0.9537(0.02)             | 0.9634(0.02)                | 0.9585(0.03)                | 0.4    | 0.9720(0.02) <sup>a</sup>    | 0.9805(0.02) <sup>a</sup>    | 1.0013(0.03)                | <0.001* |
| L2D4D                    | 0.9518(0.02)             | 0.9640(0.02)                | 0.9585(0.03)                | 0.979  | 0.9711(0.02) <sup>a</sup>    | 0.9776(0.02) <sup>a</sup>    | 0.9905(0.02)                | 0.002*  |
| Energy intake (kcal/day) | 1630.00(362.43)          | 1707.58(295.00)             | 1730.00(442.34)             | 0.648  | 1750.00(413.95) <sup>a</sup> | 1998.25(369.60) <sup>a</sup> | 2483.08(413.29)             | <0.001* |
| TSS(Minutes/week)        | 255.27(87.98)            | 374.85(140.05) <sup>a</sup> | 411.00(161.28) <sup>a</sup> | 0.001* | 423.50(147.37)               | 517.54(133.35) <sup>a</sup>  | 592.31(131.37) <sup>a</sup> | 0.041*  |
| TPA**                    | 2385.00(4177-405)        | 1300.0094124-40)            | 1674.50(2826-642)           | 0.002  | 511.50(4146-99)              | 582.00(3405-66)              | 557.00(1926-89.5)           | 0.918   |
| VPA**                    | 1485.00(1782-66)         | 660.0091782-0)              | 297.00(1386-33)             | 0.001  | 297.0091386-99)              | 264.0091782-0)               | 231.009792-33)              | 0.232   |
| MPA**                    | 720.00(1800-0)           | 320.0091760-0)              | 250.0091440-40)             | 0.005  | 90.00(960-0)                 | 120.0091440-0)               | 100.00(360-0)               | 0.491   |
| LPA**                    | 320.00(1800-0)           | 80.0091440-0)               | 540.00(1800-0)              | 0.06   | 0(1800-0)                    | 0(1680-0)                    | 0(1800-0)                   | 0.639   |

Data are expressed as mean (SD), ANOVA test (multiple comparability test Bonferroni) was used to compare means across genotype while Kruskal–Wallis test was used to test difference in physical activity.

BMI; Body mass index, NC; Neck circumference, WC; Waist circumference, WHR; Waist to hip ratio, WHtR; Waist to height ratio, R2D:4D, Ratio of right hand second to fourth digit, L2D:4D, Ratio of left hand second to fourth digit; TSS; Time spent sitting, TPA; Total physical activity, VPA; Vigorous physical activity, MPA; Moderate physical activity and LPA; Low physical activity.

\*\*Data expressed by median (range), Kruskal–Wallis test (comparability test Dunns).

\*Data expressed with same superscript in the same row are not statistically different at  $p < 0.05$
